# Supplementary material for: Transgenic Anopheles mosquitoes expressing human PAI-1 impair malaria transmission
Source: PubMed Central journal article supplement (PMC9135733; doi:10.1038/s41467-022-30606-y), 2022-05-26
Supplement: 41467_2022_30606_MOESM1_ESM.pdf [file 41467_2022_30606_MOESM1_ESM.pdf]

**TRANSGENIC *ANOPHELES* MOSQUITOES EXPRESSING HUMAN PAI-1 IMPAIR MALARIA TRANSMISSION**

Tales V. Pascini<sup>1</sup>, Yeong Je Jeong<sup>1</sup>, Wei Huang<sup>2</sup>, Zarna R. Pala<sup>1</sup>, Juliana M. Sá<sup>1</sup>, Michael B. Wells<sup>3,4</sup>, Christopher Kizito<sup>2</sup>, Brendan Sweeney<sup>1</sup>, Thiago L. Alves e Silva<sup>1</sup>, Deborah J. Andrew<sup>3</sup>, Marcelo Jacobs-Lorena<sup>2</sup>, and Joel Vega-Rodriguez<sup>1,\*</sup>

<sup>1</sup> Laboratory of Malaria and Vector Research, National Institute of Allergy and Infectious Diseases, National Institutes of Health, 12735 Twinbrook Parkway, Rm 2E20A, Rockville, MD 20852, USA.

<sup>2</sup> Department of Molecular Microbiology and Immunology, Malaria Research Institute, Johns Hopkins Bloomberg School of Public Health, Baltimore, MD 21205, USA.

<sup>3</sup> Department of Cell Biology, Johns Hopkins University School of Medicine, 725 N. Wolfe Street, G10 Hunterian, Baltimore, MD 21205, USA.

<sup>4</sup> Current address: Department of Biomedical Sciences, Idaho College of Osteopathic Medicine, Meridian, ID 83642.

\*Corresponding author: [joel.vega-rodriguez@nih.gov](mailto:joel.vega-rodriguez@nih.gov)

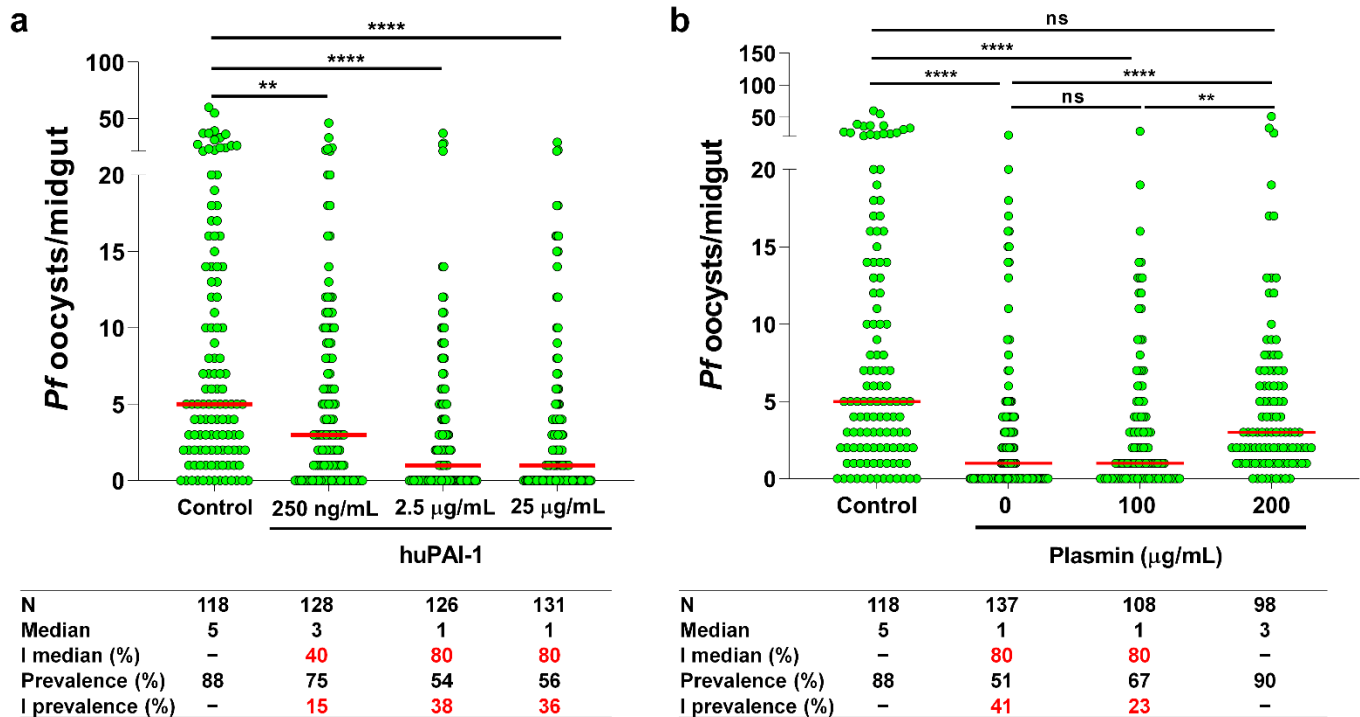

**Supplementary Fig. 1. huPAI-1 inhibits *P. falciparum* infection of *An. stephensi*.** **a, b** Oocysts numbers were determined in WT *An. stephensi* mosquitoes after feeding on *P. falciparum* infectious blood supplemented with increasing concentrations of huPAI-1 (**a**) or with 250 ng/mL of huPAI-1 plus plasmin (**b**). Horizontal red lines represent the median oocyst number of data pooled from at least three independent experiments shown in Supplementary Data 1, Datasets 1 and 2. Statistical analysis was done by Kruskal-Wallis multiple comparisons with Dunn's posttest. **a** \*\*P=0.0036, \*\*\*\*P<0.0001. **b** \*\*P=0.0022, \*\*\*\*P<0.0001. I- % inhibition, N- number of analyzed mosquitoes. The percentage inhibition of median, and prevalence was calculated as follows:  $100 \times [(\text{number of oocysts in the control} - \text{number of oocysts in the experimental}) / (\text{number of oocysts in the control})]$ .

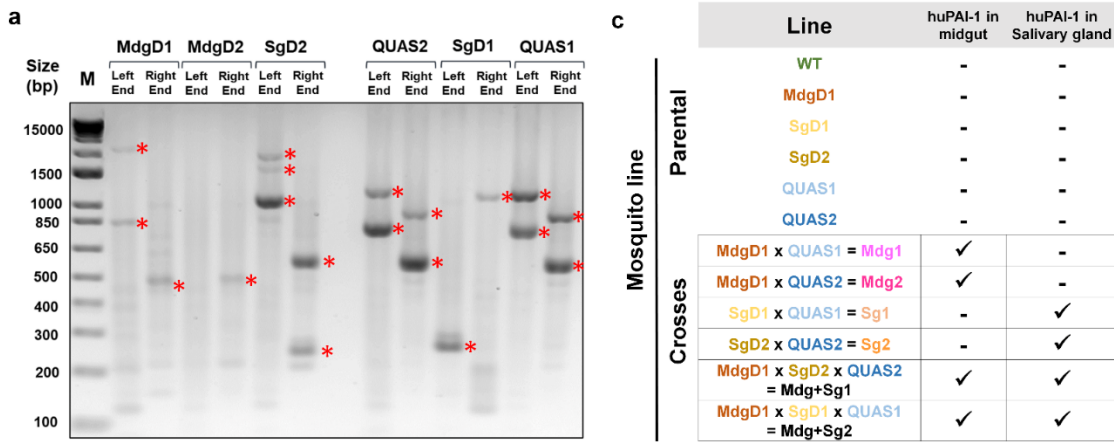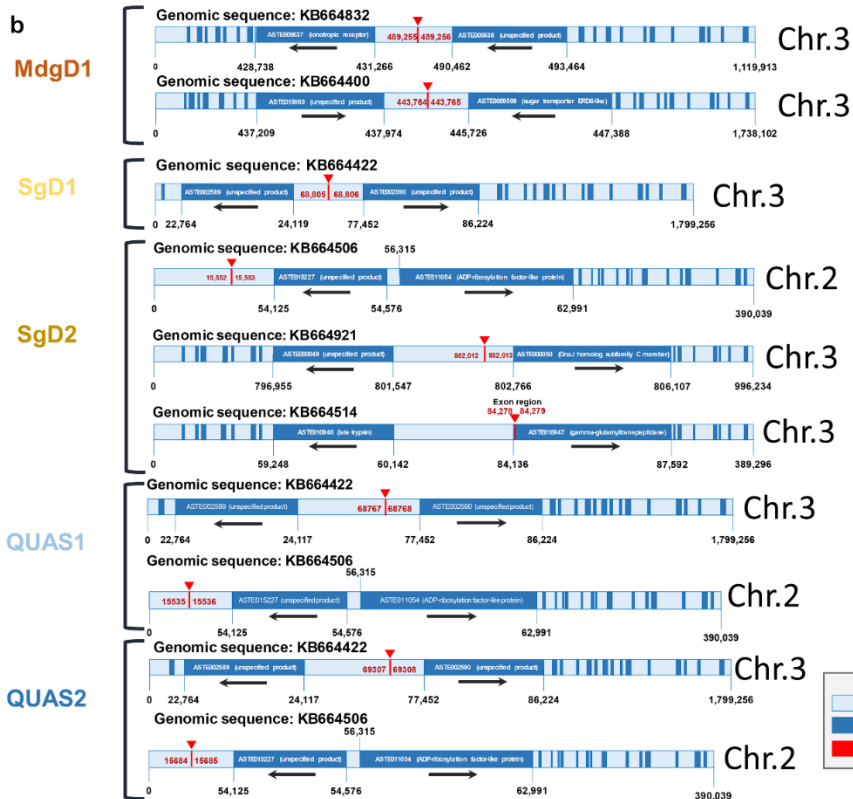

**Supplementary Fig. 2. Mapping of plasmid genome integration sites.** **a** Representative agarose gels showing the splinkerette PCR products to map the insertion 5' or 3' sequences. Bands were excised and sequenced. M- marker. The MdgD2 line was not used for the experiments described in this report. Data representative of two independent experiments. **b** Localization of plasmid integration sites in the *An. stephensi* genome. Black arrows indicate the open reading frame orientation of the genes flanking the integration site. Chr- chromosome. **c** List of the parental lines and the crosses to obtain the transgenic lines expressing huPAI-1 in the midgut and/or the salivary glands. Check marks points to expected expression of huPAI-1 in each tissue and line.

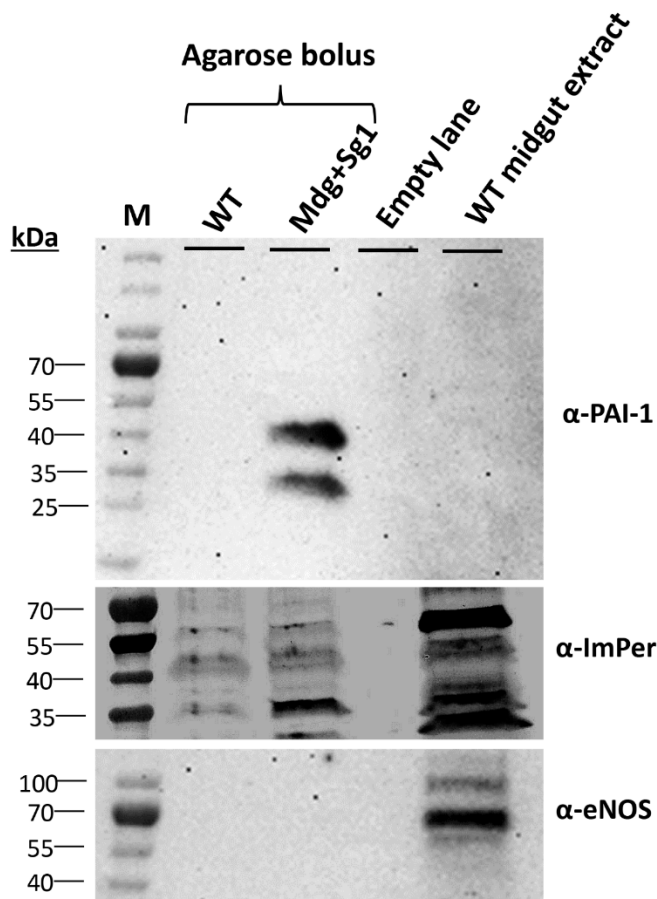

**Supplementary Fig. 3. Secretion of huPAI-1 into the midgut lumen of transgenic mosquitoes.** Secretion of huPAI-1 in the midgut lumen was assessed by the low-melting agarose assay. Liquid low-melting agarose was fed to mosquitoes and after solidification, agarose boluses were dissected, and the secreted proteins trapped in the bolus were analyzed by Western blotting with an anti-huPAI-1 antibody. An anti-IMPer antibody was used as a positive control for a midgut secreted protein and an anti-eNOS was used as a negative control for a midgut non-secreted protein. The MDG+Sg1 line was used as representative for the transgenic lines. M- marker, WT-wild type. Data representative of two independent experiments.

**a****QUAS1 parental day 4 or 8 p.e. DAPI WGA CC3**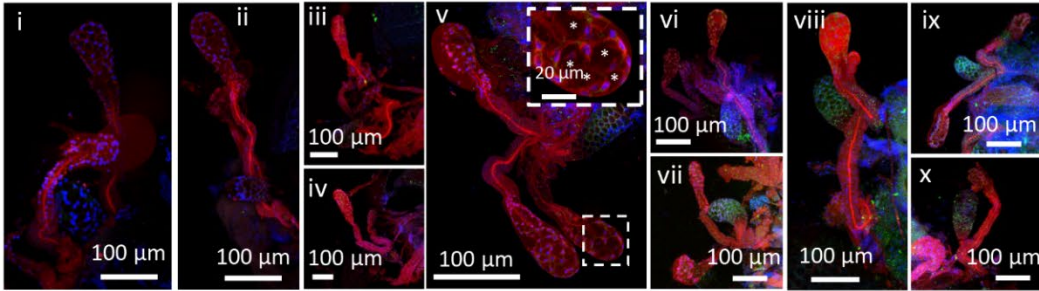**b****SgD1 parental day 4 or 8 p.e. DAPI WGA CC3**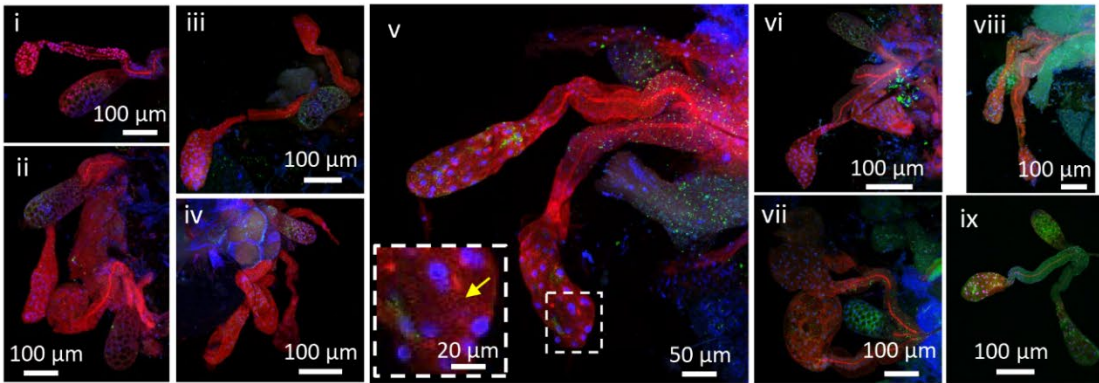**c****Sg1 day 4 or 8 p.e. DAPI WGA CC3**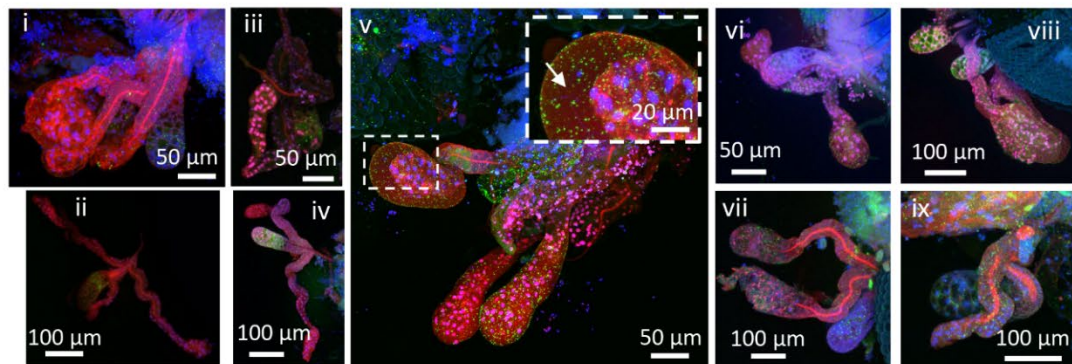**d****Sg1 day 1 p.e. DAPI WGA CC3**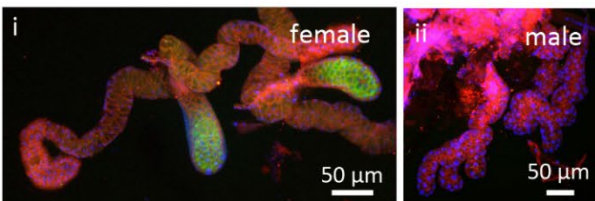**e****Sg1 day 14 p.e.****DAPI WGA α-Tub**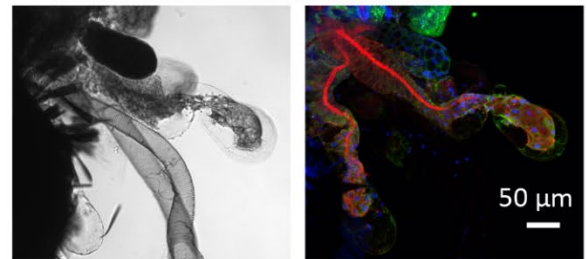

**Supplementary Fig. 4. huPAI-1 expression leads to altered salivary gland structure.** Salivary glands (SGs) were dissected four or eight days (**a-c**), one day (**d**), or fourteen days (**e**) post-emergence and stained with anti-cleaved caspase 3 antiserum (CC3, a cell death marker; green in panels **a-d**), anti- $\alpha$ -tubulin ( $\alpha$ -Tub, green in panel **e**), DAPI (DNA, blue), and WGA (chitin/O-GlcNAcylation; red). Shown are representative 3D projection (MIP) confocal images of parental female QUAS-PAI-1 effector (**a**), parental female SgD1 driver (**b**), and male or female huPAI Sg transgenic (**c-d**) SGs. SGs are organized left to right by increasing CC3 signals in the lateral lobes. SGs from huPAI Sg transgenic and QUAS-PAI-1 males have very little CC3 staining confined to a perinuclear localization (data not shown). CC3 staining of female huPAI Sg transgenic medial lobe is high even at day 1 post-emergence (Di), but low and diffused in the lateral lobes, which possess a WT SG architecture at this early time point compared to day 4 or 8 post-emergence (**a-c**). No phenotypic differences were observed between day 4 and day 8 adult SGs. The parental SgD1 driver and huPAI Sg transgenics (**b-c**) consistently show lumen and secretory cavity loss, cell misorganization, and variable (but higher) levels and intensities of CC3 punctae than QUAS-PAI-1 females (**a**). For example, compare Bv and Cv to Av (figures and inserts): asterisks mark secretory cavities (Av); yellow arrows mark lumen loss (Bv) or cell misorganization (Bv, Cv); and white arrow mark cells pulling away from basement membrane (Cv). Substantial damage to the distal lobes can be observed at day 14 post emergence (**e**). Refer to **Fig. 2** for phenotypic explanations. Data in panels a-e is representative of at least two independent experiments.

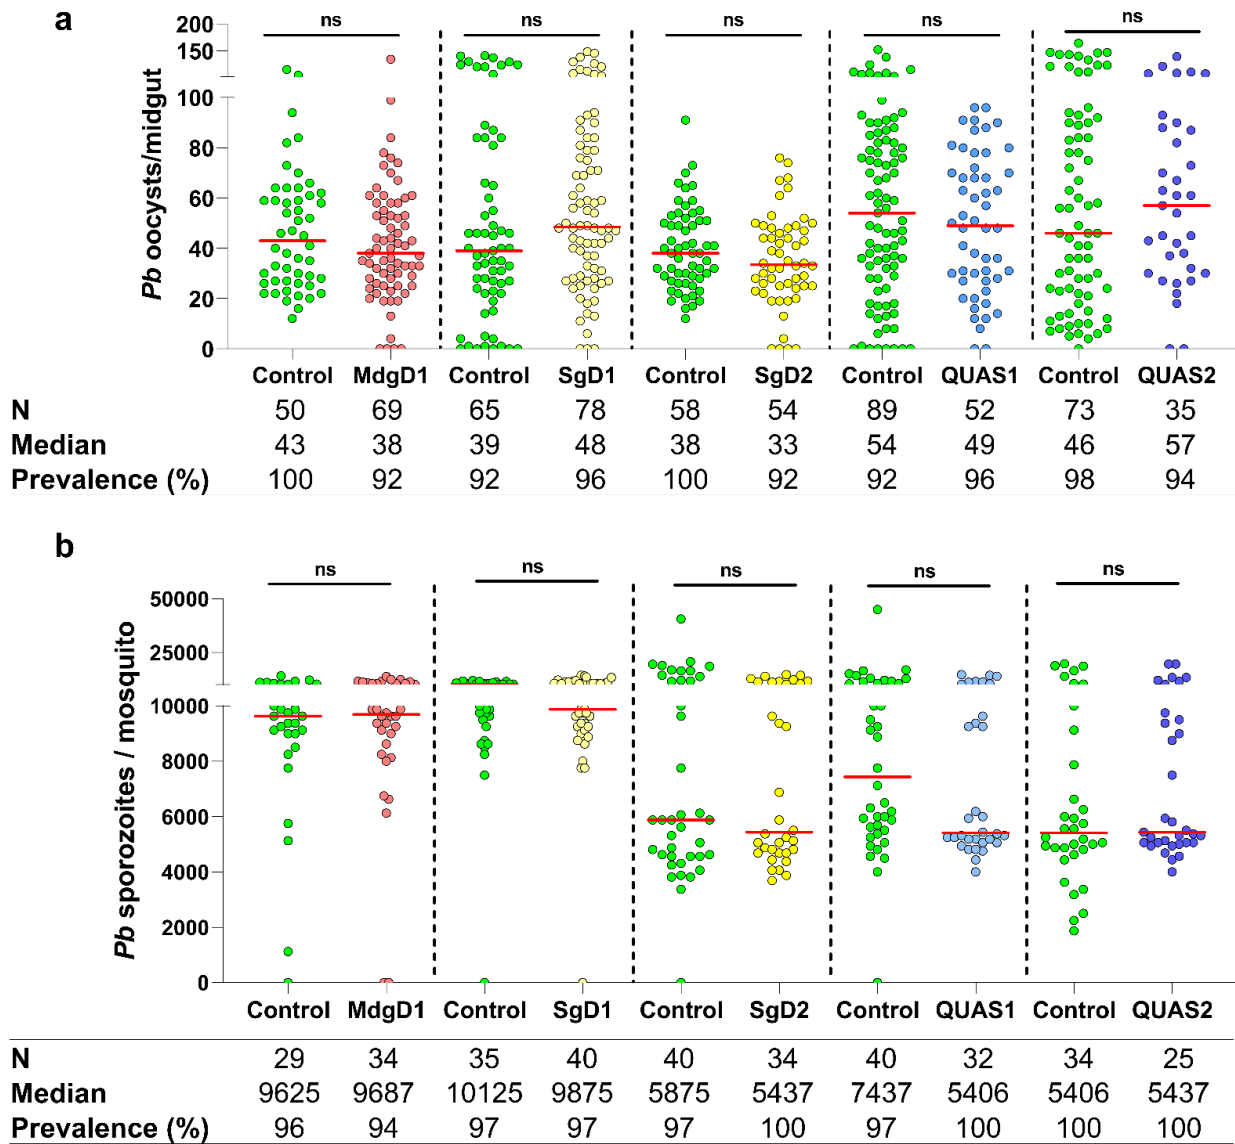

**Supplementary Fig. 5. Midgut and salivary gland infection are not affected in the transgenic parental lines.**

WT and transgenic parental mosquitoes were simultaneously fed on the same *P. berghei* infected mouse (WT and one transgenic per infected mouse). **a** Midgut infections were determined by oocyst counts at 10 days post-infection. **b** Salivary gland infection was determined by the total number of sporozoites present in the salivary gland of individual mosquitoes at 21 days post-infection. Horizontal red lines represent the medians. Oocyst data pooled from three independent experiments and salivary gland data pooled from two independent experiments (Supplementary Data 1, Datasets 3 and 7). Statistical analysis was done by two-tailed Mann-Whitney U test. ns: not significant, N: number of analyzed mosquitoes.



Sg1 + *Plasmodium berghei* day 21 p.i.

DAPI

WGA

TRAP

CSP

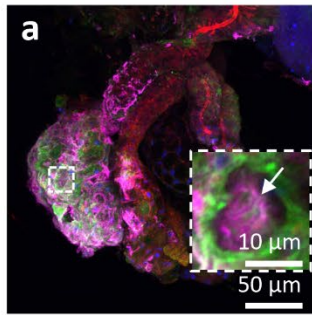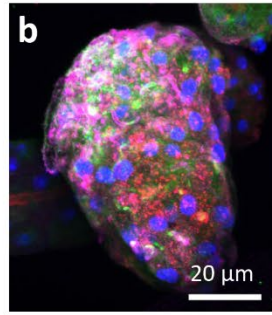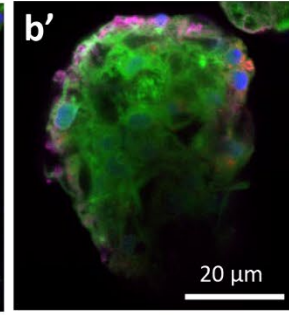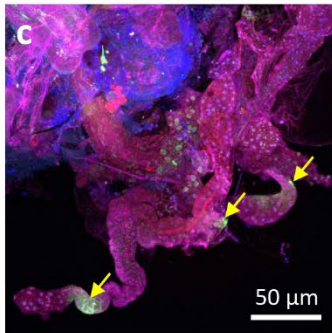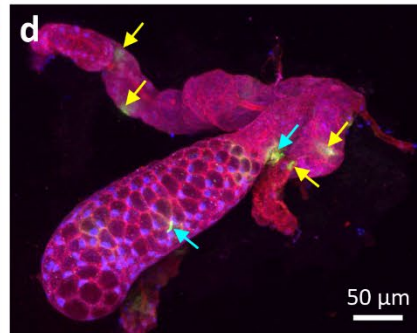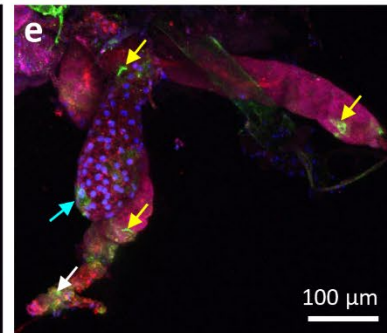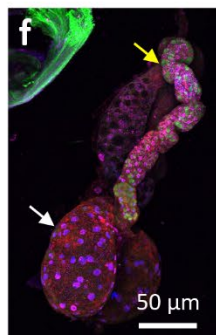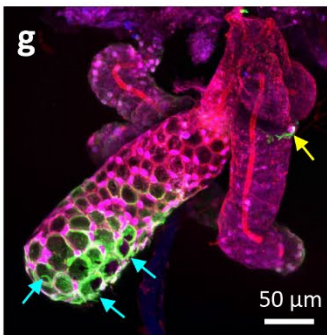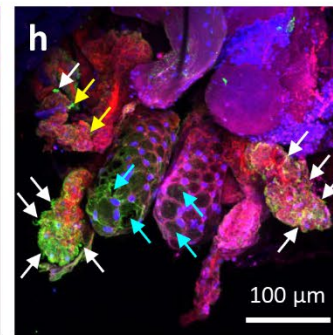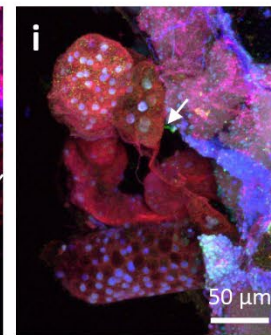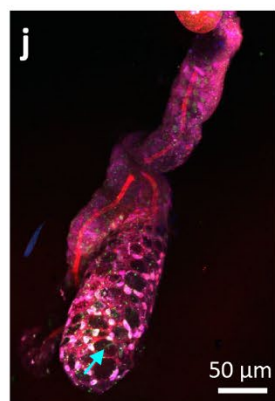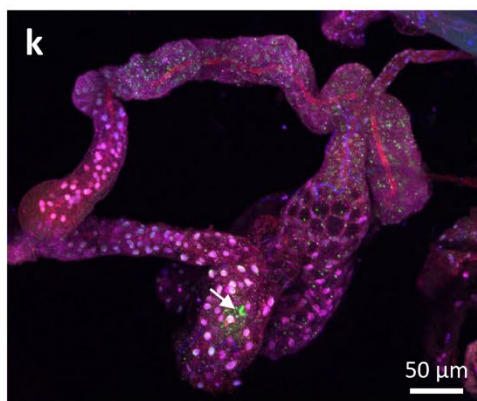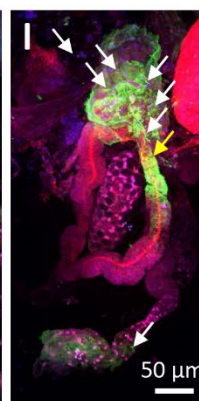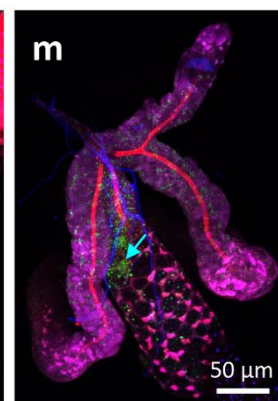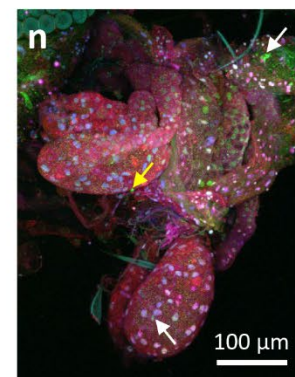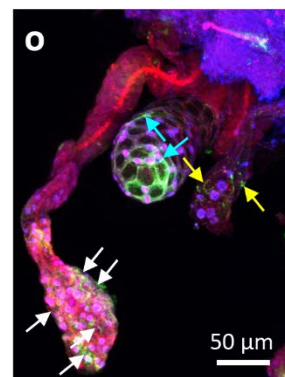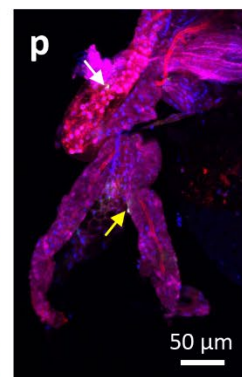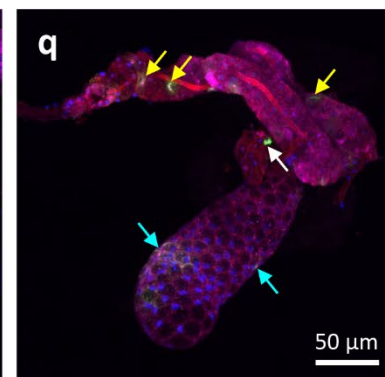



**Supplementary Fig. 6. Poor sporozoite invasion and few accumulations are observed in huPAI-1 Sg transgenics.** Salivary glands from transgenic mosquitoes expressing huPAI-1 in the salivary glands were dissected 21 days post infection, processed, and stained with anti-TRAP (parasite; green) and anti-CSP (parasite; magenta) antisera, DAPI (DNA, blue), and WGA (chitin/O-GlcNAcylation; red). Invasion events are marked by lobe type using colored arrows (DL-white, PL-yellow, M-cyan). Results suggest that SGs expressing huPAI-1 are consistently poorly invaded by *Plasmodium berghei* sporozoites. High accumulations of shed parasite proteins within some DL lobes, in the absence of large numbers of invaded parasites [**b**, **b'**, TRAP (green)], may indicate that some invaded sporozoites die.

**WT**

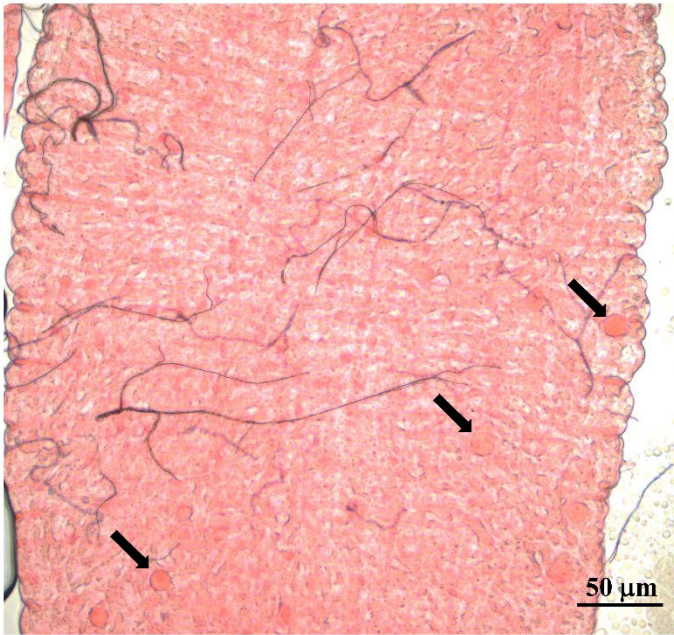

**Mdg1**

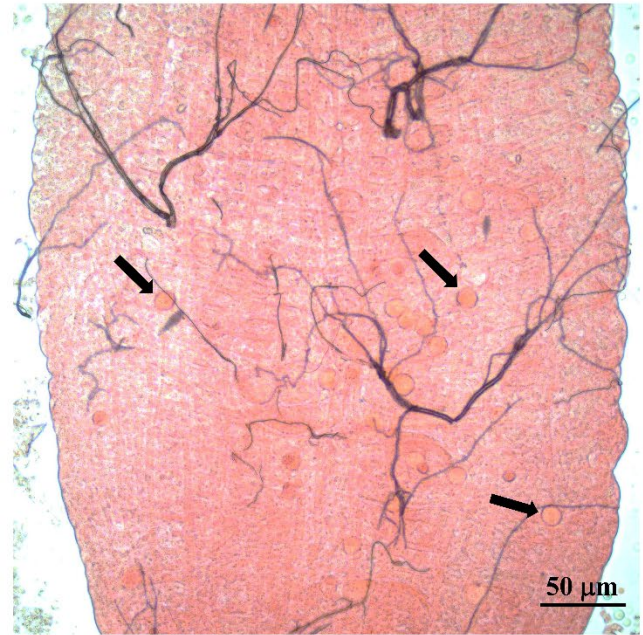

**Mdg+Sg1**

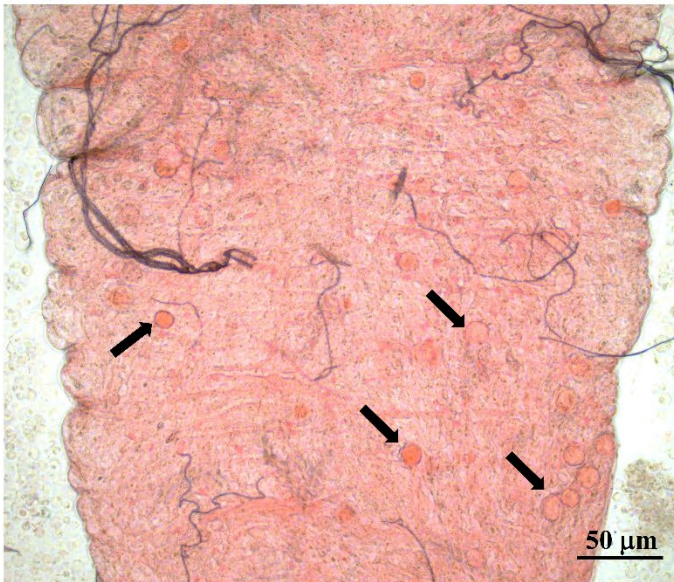

**Oocysts diameter**

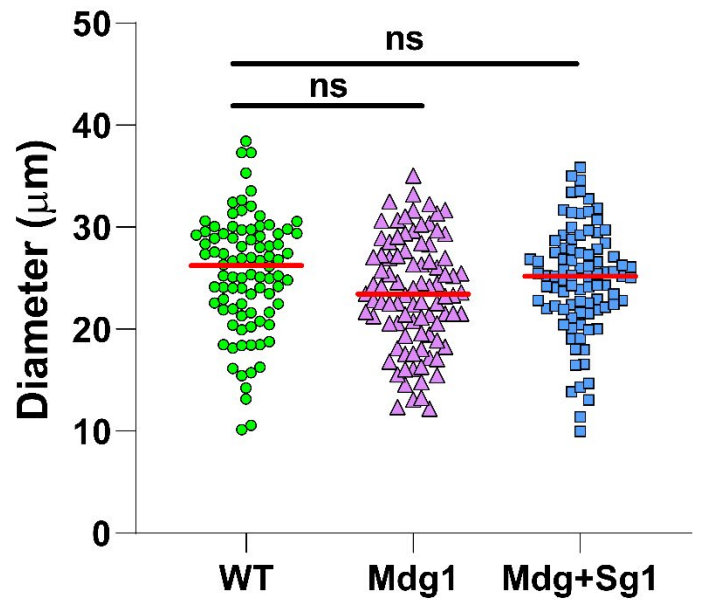

**Supplementary Fig. 7. *P. berghei* oocyst diameter in WT and transgenic lines.** Oocyst diameter was measured in *P. berghei* infected midguts from WT, Mdg1 and Mdg+Sg1 mosquitoes dissected 12 days-post infection. Oocysts were stained with 0.2% mercurochrome and imaged in an Axio Imager.M2 microscope (Carl Zeiss Microscopy, LLC). Oocyst diameter was measured with the Image-Pro Plus version 4.0 software. Black arrows point at oocysts. Statistical analysis was done by Kruskal-Wallis multiple comparisons with Dunn's posttest. Data from two independent experiments. ns: not significant.

**Supplementary Data 1. Analysis of individual mosquito infections with *P. berghei*, *P. falciparum* and *P. vivax*.**

Provided as a separate excel file.

**Supplementary Table 1. Quantification of architecture and sporozoite organization in SGs of WT and Sg1 transgenic mosquitoes.** Salivary glands were dissected 21 days post infection with *P. berghei* parasites and were stained with anti-TRAP (parasite) and anti-CSP (parasite) antisera, DAPI (DNA), and WGA (chitin/O-GlcNAcylation). The data includes the phenotypes from salivary glands of WT and Sg1 transgenic mosquitoes shown in Fig. 6B-C and Supplementary Fig. 6.

| <b>Strain/lobe</b> | <b># with good architecture</b> | <b># infected</b> | <b># with spz bundles</b> | <b># with spz in lumen</b> |
|--------------------|---------------------------------|-------------------|---------------------------|----------------------------|
| WT DL<br>(n=8)     | 7 (88%)                         | 7 (88%)           | 7 (88%)                   | 7 (88%)                    |
| WT PL<br>(n=9)     | 8 (89%)                         | 5 (63%)           | 0                         | 0                          |
| WT M<br>(n=9)      | 3 (33%)                         | 2 (22%)           | 0                         | 1 (11%)                    |
| Sg1 DL<br>(n=33)   | 6 (18%)                         | 18 (55%)          | 8 (24%)                   | 3 (9%)                     |
| Sg1 PL<br>(n=46)   | 14 (30%)                        | 19 (41%)          | 3 (6.5%)                  | 0                          |
| Sg1 M<br>(n=21)    | 15 (71%)                        | 8 (38%)           | 2 (9.5%)                  | 3 (14%)                    |

**Supplementary Table 2. List of primers used in this study.**

| <b>Primers</b>       | <b>Sequence</b>                                                        |
|----------------------|------------------------------------------------------------------------|
| <b>PAI-FW</b>        | 5' - GCGGCCGCGGCTCGAG ATGCAGATGTCTCCAGCCCT - 3'                        |
| <b>PAI-RV</b>        | 5' - AGATCGACGTCTCGAGTCAGGGTTCATCACTTGGC - 3'                          |
| <b>MgP-FW</b>        | 5' - ATCAATGTATCTCGAGTACCGGCAACTGTTGTTGAGG - 3'                        |
| <b>MgP-RV</b>        | 5' - GTTGGCCGGCCTCGAGGATGAGAATGTTAGATGCCGCGAGTTG - 3'                  |
| <b>YFP-FW</b>        | 5' - GGGCCCGGGATCCACCGGTCGCCACCATGGTGAGCAAGGGCGAGGA - 3'               |
| <b>YFP-RV</b>        | 5' - GCGGCCGCTACTTGTACAGCTCGTCCA - 3'                                  |
| <b>SgP - FW</b>      | 5' - ATCAATGTATCTCGAGGGACTTCGCGTCGGTAGTAG - 3'                         |
| <b>SgP - RV</b>      | 5' - GTTGGCCGGCCTCGAGCGTTTATTCACCTGTGAGCTATGG - 3'                     |
| <b>splink-Top</b>    | 5' - GATCCCACTAGTGTGACACCAGTCTCTAATTTTTTTTTTCAAAAAA - 3'               |
| <b>splink-Bottom</b> | 5' - CGAAGAGTAACCGTTGCTAGGAGAGACCGTGGCTGAATGAGACTGGTGTGACACTAGTGG - 3' |
| <b>splink#1</b>      | 5' - CGAAGAGTAACCGTTGCTAGGAGAGACG - 3'                                 |
| <b>splink #2</b>     | 5' - GTGGCTGAATGAGACTGGTGTGAC - 3'                                     |
| <b>piggybac LE#1</b> | 5' - CAGTGACACTTACCGCATTGACAAGC - 3'                                   |
| <b>piggybac LE#2</b> | 5' - GCGACTGAGATGCCTAAATGCAC - 3'                                      |
| <b>piggybac RE#1</b> | 5' - CGATATACAGACCGATAAAACACATGCGTC - 3'                               |
| <b>piggybac RE#2</b> | 5' - ACGCATGATTATCTTTAACGTAC - 3'                                      |
| <b>huPAI-1 - FW</b>  | 5' - TCCAGCGGGATCTGAAGCTG - 3'                                         |
| <b>huPAI-1 - RV</b>  | 5' - TGTCCAAGCAAGTGGCTGA - 3'                                          |
| <b>S7 - FW</b>       | 5' - CTAACGACACGAAGACCACAAGA - 3'                                      |
| <b>S7 - RV</b>       | 5' - CAACCTGCAACGAAGCAAAA - 3'                                         |
